# Supplementary material
Source: PubMed Central journal article supplement (PMC3953455)
Supplement: NIHMS497854-supplement-1_si_001.pdf [file NIHMS497854-supplement-1_si_001.pdf]

## Supporting Information

Paper Title: Mutual Regioselective Inhibition of Human UGT1A1-Mediated  
Glucuronidation of Four Flavonoids

Authors: Guo Ma, Baojian Wu, Song Gao, Zhen Yang, Yong Ma and Ming Hu

**Table S1 Apparent Enzyme Kinetic Parameters of Glucuronidation of 3HF,7HF and 4'HF in the Presence of 3,7,4'THF Fitted to Different Inhibition Kinetics Model ( $n=3$ ,  $\bar{x} \pm SD$ )**

| Glucuronides      | Inhibition model               | Competitive       | Noncompetitive    | Uncompetitive     | Mixed-type        |
|-------------------|--------------------------------|-------------------|-------------------|-------------------|-------------------|
|                   |                                | Inhibition        | Inhibition        | Inhibition        | Inhibition        |
| 3HF- <i>O</i> -G  | $K_m$ ( $\mu\text{M}$ )        | 1.382 $\pm$ 0.240 | 2.273 $\pm$ 0.287 | 2.857 $\pm$ 0.475 | 1.675 $\pm$ 0.286 |
|                   | $V_{\text{max}}$ (nmol/mg/min) | 1.909 $\pm$ 0.083 | 2.189 $\pm$ 0.099 | 2.328 $\pm$ 0.155 | 2.015 $\pm$ 0.097 |
|                   | $K_i$ ( $\mu\text{M}$ )        | 0.267 $\pm$ 0.045 | 1.312 $\pm$ 0.124 | 0.876 $\pm$ 0.116 | 0.509 $\pm$ 0.151 |
|                   | $\alpha$                       | -                 | -                 | -                 | 5.034 $\pm$ 1.080 |
|                   | $R^2$                          | 0.943             | 0.946             | 0.921             | 0.953             |
|                   | $AIC$                          | 1.759             | -0.980            | 21.808            | -7.600            |
| 7HF- <i>O</i> -G  | $K_m$ ( $\mu\text{M}$ )        | 1.628 $\pm$ 0.212 | 2.472 $\pm$ 0.185 | 3.166 $\pm$ 0.333 | 2.212 $\pm$ 0.233 |
|                   | $V_{\text{max}}$ (nmol/mg/min) | 1.302 $\pm$ 0.045 | 1.480 $\pm$ 0.041 | 1.599 $\pm$ 0.070 | 1.430 $\pm$ 0.049 |
|                   | $K_i$ ( $\mu\text{M}$ )        | 0.456 $\pm$ 0.061 | 1.936 $\pm$ 0.123 | 1.236 $\pm$ 0.115 | 1.286 $\pm$ 0.329 |
|                   | $\alpha$                       | -                 | -                 | -                 | 1.903 $\pm$ 0.799 |
|                   | $R^2$                          | 0.959             | 0.976             | 0.961             | 0.977             |
|                   | $AIC$                          | -72.612           | -105.595          | -75.240           | -106.328          |
| 4'HF- <i>O</i> -G | $K_m$ ( $\mu\text{M}$ )        | 1.821 $\pm$ 0.230 | 2.810 $\pm$ 0.243 | 3.616 $\pm$ 0.448 | 2.289 $\pm$ 0.269 |
|                   | $V_{\text{max}}$ (nmol/mg/min) | 0.664 $\pm$ 0.024 | 0.757 $\pm$ 0.025 | 0.821 $\pm$ 0.044 | 0.711 $\pm$ 0.027 |
|                   | $K_i$ ( $\mu\text{M}$ )        | 0.410 $\pm$ 0.051 | 1.706 $\pm$ 0.120 | 1.072 $\pm$ 0.115 | 0.871 $\pm$ 0.205 |
|                   | $\alpha$                       | -                 | -                 | -                 | 3.147 $\pm$ 1.056 |
|                   | $R^2$                          | 0.965             | 0.972             | 0.952             | 0.975             |
|                   | $AIC$                          | -163.055          | -176.976          | -145.000          | -182.221          |

This information is available free of charge via the Internet at <http://pubs.acs.org/>.

**Table S2 Apparent Enzyme Kinetic Parameters of Glucuronidation of 3,7,4'THF (3,7,4'THF-3-O-G and 3,7,4'THF-7-O-G) in the Presence of 3HF, 7HF and 4'HF Using Different Inhibition Kinetics Model, respectively. ( $n=3$ ,  $\bar{x} \pm SD$ )**

| Metabolites/ Inhibitors |                                | Inhibition model | Competitive | Noncompetitive | Uncompetitive | Mixed-type  |
|-------------------------|--------------------------------|------------------|-------------|----------------|---------------|-------------|
|                         |                                |                  | Inhibition  | Inhibition     | Inhibition    | Inhibition  |
| 3HF                     | $K_m$ ( $\mu\text{M}$ )        |                  | 0.113±0.037 | 0.257±0.038    | 0.290±0.048   | 0.200±0.045 |
|                         | $V_{\text{max}}$ (nmol/mg/min) |                  | 0.541±0.021 | 0.635±0.024    | 0.644±0.029   | 0.609±0.026 |
|                         | $K_i$ ( $\mu\text{M}$ )        |                  | 1.333±0.297 | 11.509±1.570   | 9.626±1.491   | 4.142±1.243 |
|                         | $\alpha$                       | --               | --          | --             | --            | 3.966±1.760 |
|                         | $R^2$                          |                  | 0.735       | 0.796          | 0.768         | 0.809       |
|                         | $AIC$                          |                  | -69.843     | -85.703        | -77.813       | -87.505     |
| 3,7,4'THF-3-O-G         | $K_m$ ( $\mu\text{M}$ )        |                  | 0.078±0.041 | 0.262±0.041    | 0.296±0.056   | 0.194±0.045 |
|                         | $V_{\text{max}}$ (nmol/mg/min) |                  | 0.558±0.027 | 0.686±0.028    | 0.697±0.035   | 0.653±0.029 |
|                         | $K_i$ ( $\mu\text{M}$ )        |                  | 0.351±0.185 | 4.947±0.541    | 3.998±0.517   | 1.766±0.720 |
|                         | $\alpha$                       | --               | --          | --             | --            | 3.955±1.273 |
|                         | $R^2$                          |                  | 0.766       | 0.861          | 0.829         | 0.873       |
|                         | $AIC$                          |                  | -52.258     | -83.323        | -71.038       | -86.884     |
| 4'HF                    | $K_m$ ( $\mu\text{M}$ )        |                  | 0.089±0.054 | 0.246±0.055    | 0.284±0.070   | 0.214±0.069 |
|                         | $V_{\text{max}}$ (nmol/mg/min) |                  | 0.577±0.036 | 0.707±0.040    | 0.722±0.047   | 0.690±0.046 |
|                         | $K_i$ ( $\mu\text{M}$ )        |                  | 0.660±0.419 | 6.696±1.117    | 5.437±0.992   | 3.664±0.768 |
|                         | $\alpha$                       | --               | --          | --             | --            | 2.168±1.161 |
|                         | $R^2$                          |                  | 0.601       | 0.716          | 0.697         | 0.719       |
|                         | $AIC$                          |                  | -11.833     | -32.092        | -28.240       | -30.763     |
| 3HF                     | $K_m$ ( $\mu\text{M}$ )        |                  | 0.146±0.036 | 0.247±0.035    | 0.274±0.042   | 0.213±0.045 |
|                         | $V_{\text{max}}$ (nmol/mg/min) |                  | 0.612±0.021 | 0.687±0.025    | 0.697±0.029   | 0.670±0.029 |
|                         | $K_i$ ( $\mu\text{M}$ )        |                  | 3.363±1.189 | 20.769±3.681   | 17.517±3.379  | 9.043±2.715 |
|                         | $\alpha$                       | --               | --          | --             | --            | 3.051±1.229 |
|                         | $R^2$                          |                  | 0.703       | 0.745          | 0.729         | 0.751       |
|                         | $AIC$                          |                  | -63.476     | -72.745        | -68.942       | -72.122     |
| 3,7,4'THF-7-O-G         | $K_m$ ( $\mu\text{M}$ )        |                  | 0.078±0.040 | 0.256±0.041    | 0.288±0.055   | 0.186±0.046 |
|                         | $V_{\text{max}}$ (nmol/mg/min) |                  | 0.619±0.030 | 0.759±0.032    | 0.771±0.039   | 0.721±0.033 |
|                         | $K_i$ ( $\mu\text{M}$ )        |                  | 0.392±0.203 | 5.377±0.617    | 4.362±0.585   | 1.809±0.762 |
|                         | $\alpha$                       | --               | --          | --             | --            | 4.331±1.600 |
|                         | $R^2$                          |                  | 0.763       | 0.845          | 0.814         | 0.859       |
|                         | $AIC$                          |                  | -40.305     | -65.960        | -54.749       | -69.591     |
| 4'HF                    | $K_m$ ( $\mu\text{M}$ )        |                  | 0.120±0.057 | 0.255±0.058    | 0.293±0.072   | 0.231±0.076 |
|                         | $V_{\text{max}}$ (nmol/mg/min) |                  | 0.651±0.039 | 0.775±0.046    | 0.791±0.053   | 0.761±0.054 |
|                         | $K_i$ ( $\mu\text{M}$ )        |                  | 1.434±0.796 | 10.190±2.057   | 8.301±1.803   | 6.223±1.738 |
|                         | $\alpha$                       | --               | --          | --             | --            | 1.886±0.588 |
|                         | $R^2$                          |                  | 0.552       | 0.641          | 0.626         | 0.642       |
|                         | $AIC$                          |                  | 3.050       | -8.466         | -7.695        | -10.151     |

**Table S3. IC<sub>50</sub> Values of 3,7,4'THF as the Inhibitor of Glucuronidation of 3HF,7HF and 4'HF**

| Substrate name | Conc. (μM) | 0.625     | 2.5       | 5         | 10        |
|----------------|------------|-----------|-----------|-----------|-----------|
| 3HF            |            | 1.07±0.08 | 1.10±0.03 | 1.22±0.01 | 1.55±0.06 |
| 7HF            |            | 1.80±0.07 | 1.81±0.06 | 2.24±0.07 | 2.40±0.06 |
| 4'HF           |            | 1.69±0.09 | 1.57±0.08 | 1.95±0.10 | 2.03±0.06 |

Concentrations of the inhibitor 3,7,4'THF were 0, 0.313, 0.625, 1.25, 5 μM.

**Table S4 IC<sub>50</sub> Values of MHF-mediated Inhibition of Glucuronidation of 3,7,4'THF**

|                                  |      | 3,7,4'THF (μM) |            |            |            |
|----------------------------------|------|----------------|------------|------------|------------|
| Substrate Glucuronides/Inhibitor |      | 0.313          | 0.625      | 1.25       | 5          |
| 3,7,4'THF-3-O-G                  | 3HF  | 6.74±1.53      | 8.14±0.35  | 10.98±1.09 | 13.68±0.95 |
|                                  | 7HF  | 3.61±0.41      | 4.85±0.33  | 4.64±0.20  | 7.27±0.14  |
|                                  | 4'HF | 6.70±0.99      | 5.66±0.30  | 6.59±0.70  | 9.34±0.59  |
| 3,7,4'THF-7-O-G                  | 3HF  | 10.30±1.05     | 18.13±2.05 | 15.29±1.83 | 24.49±2.68 |
|                                  | 7HF  | 3.96±0.22      | 5.21±0.66  | 4.77±0.08  | 8.93±0.37  |
|                                  | 4'HF | 11.30±0.55     | 8.21±0.48  | 8.25±0.60  | 13.94±0.36 |

Concentrations of the inhibitor 3HF,7HF and 4'HF were 0, 0.625, 2.5, 5, 10 μM, respectively.

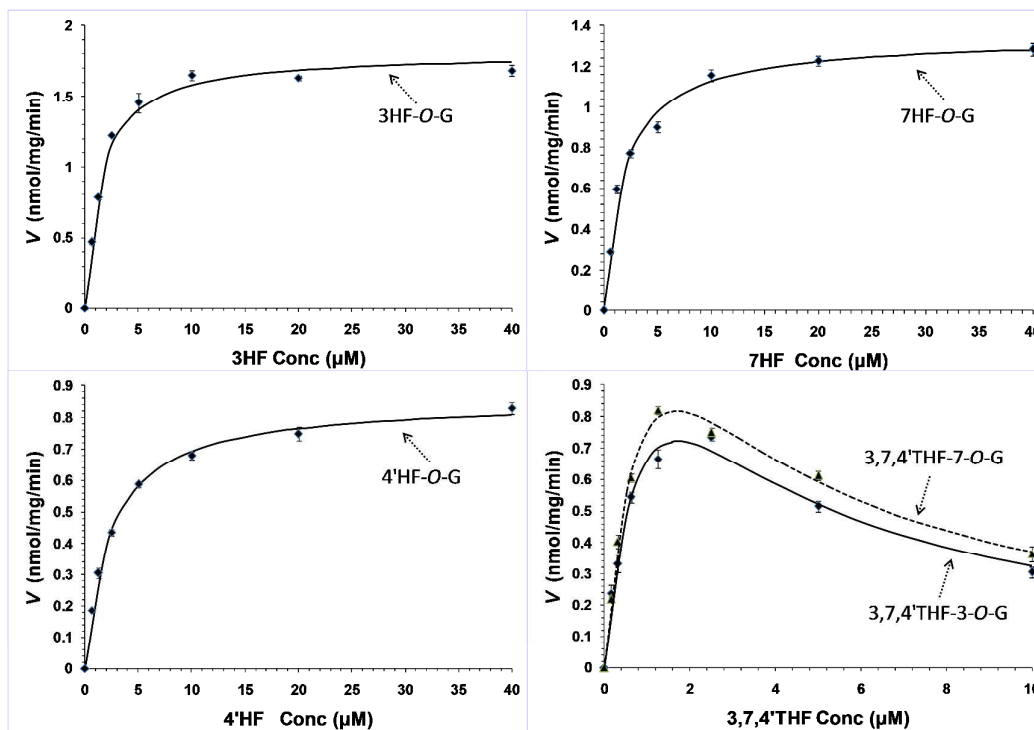

**Figure S1.** Kinetics profiles of UGT1A1-mediated glucuronidation of four flavonoids (3HF, 7HF, 4'HF and 3,7,4' THF). Diamonds (triangle) and smooth lines denote observed and predicted glucuronidation rates of flavonoids, respectively. Solid and dashed lines denote formation rates of 3,7,4'THF-3-O-G and 3,7,4' THF-7-O-G, respectively. Predicted glucuronidation rates of 3HF, 7HF, 4'HF were from Michaelis-Menten models. Predicted glucuronidation rates of 3,7,4'THF were from substrate inhibition models. Each data point represents the average of three replicates. Experimental details are presented under *Materials and Methods*. For kinetic parameters, please see Table 2.

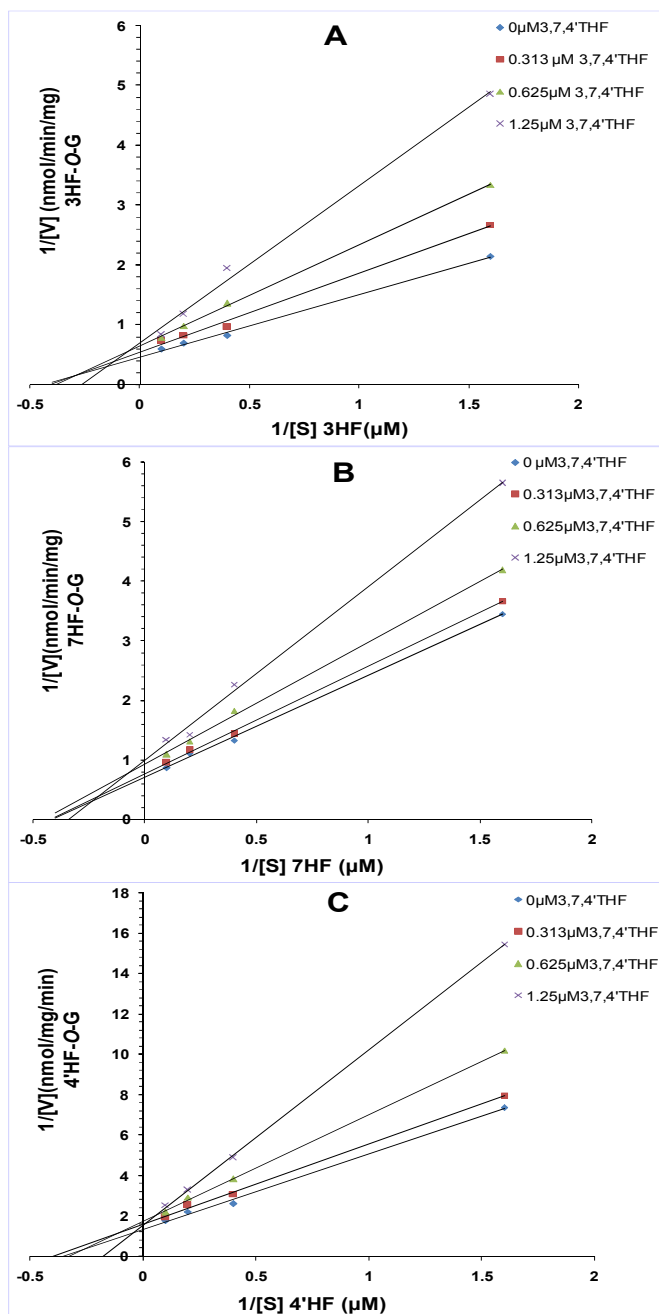

**Figure S2.** Lineweaver-Burk (double-reciprocal) plots ( $1/V$  versus  $1/[S]$ ) of UGT1A1-mediated glucuronidation of 3HF (A, 3HF-O-G), 7HF (B, 7HF-O-G) and 4HF (C, 4HF-O-G) in the presence of different concentrations of 3,7,4'THF, respectively. Concentrations of the substrate 3HF, 7HF, 4HF were 0.625, 2.5, 5 and 10  $\mu\text{M}$ , respectively. Concentrations of the inhibitor 3,7,4'THF were 0, 0.313, 0.625 and 1.25  $\mu\text{M}$ . This is a corresponding ampliative Lineweaver-Burk plots at the lower inhibitor concentrations from Figure 3. Each plot represents the mean of duplicate measurements.
